# Supplementary material for: Designing Antioxidant and Antimicrobial Polyethylene Films with Bioactive Compounds/Clay Nanohybrids for Potential Packaging Applications
Source: MDPI journal article supplement (doi:10.3390/molecules28072945), 2023-03-25
Supplement: s1 [file s1]

## Supplementary Material

# Designing antioxidant and antimicrobial polyethylene films with bioactive compounds/clay nanohybrids for potential packaging applications

Konstantinos Safakas<sup>1</sup>, Iro Giotopoulou<sup>2</sup>, Archontoula Giannakopoulou<sup>3</sup>, Katerina Katerinopoulou<sup>1</sup>, Georgia C. Lainioti<sup>1,\*</sup>, Haralambos Stamatis<sup>3</sup>, Nektaria-Marianthi Barkoula<sup>2</sup> and Athanasios Ladavos<sup>1,\*</sup>

<sup>1</sup> Department of Food Science & Technology, University of Patras, GR-30100, Agrinio, Greece; ksafakas@upatras.gr (K.S.), akaterin@upatras.gr (K.K.), glainioti@upatras.gr (G.C.L.), alantavo@upatras.gr (A.L.)

<sup>2</sup> Department of Materials Science and Engineering, University of Ioannina, GR-45110, Ioannina, Greece; i.giotopoulou@uoi.gr (I.G.), nbarkoul@uoi.gr (N.-M.B.)

<sup>3</sup> Department of Biological Applications and Technology, University of Ioannina, GR-45110, Ioannina, Greece; a.giannakopoulou@uoi.gr (A.G.), hstamati@uoi.gr (H.S.)

\* Correspondence: glainioti@upatras.gr (G.C.L.), alantavo@upatras.gr (A.L.); Tel.: (+30 26410 74134; +30 26410 74126)

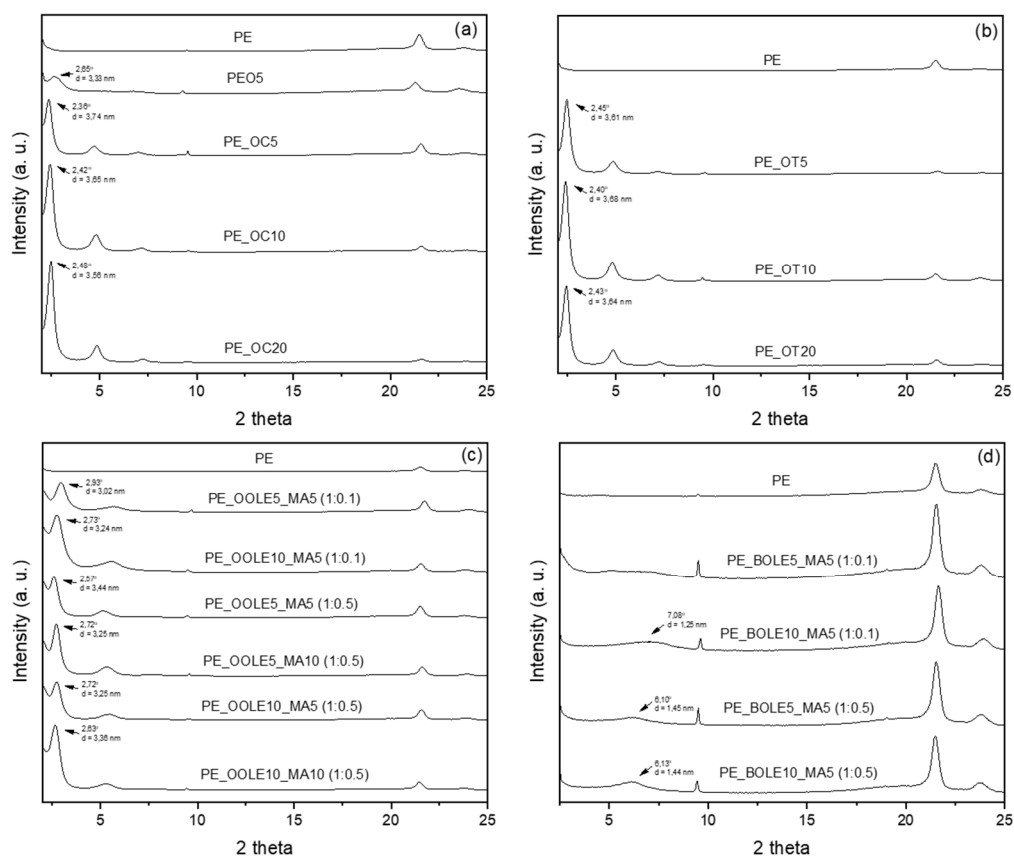

**Figure S1.** XRD patterns of LDPE films with organically modified montmorillonite loaded with (a) carvacrol (OC) (b) thymol (OT), (c) solgar (OOLE) and (d) bentonite loaded with solgar (BOLE).

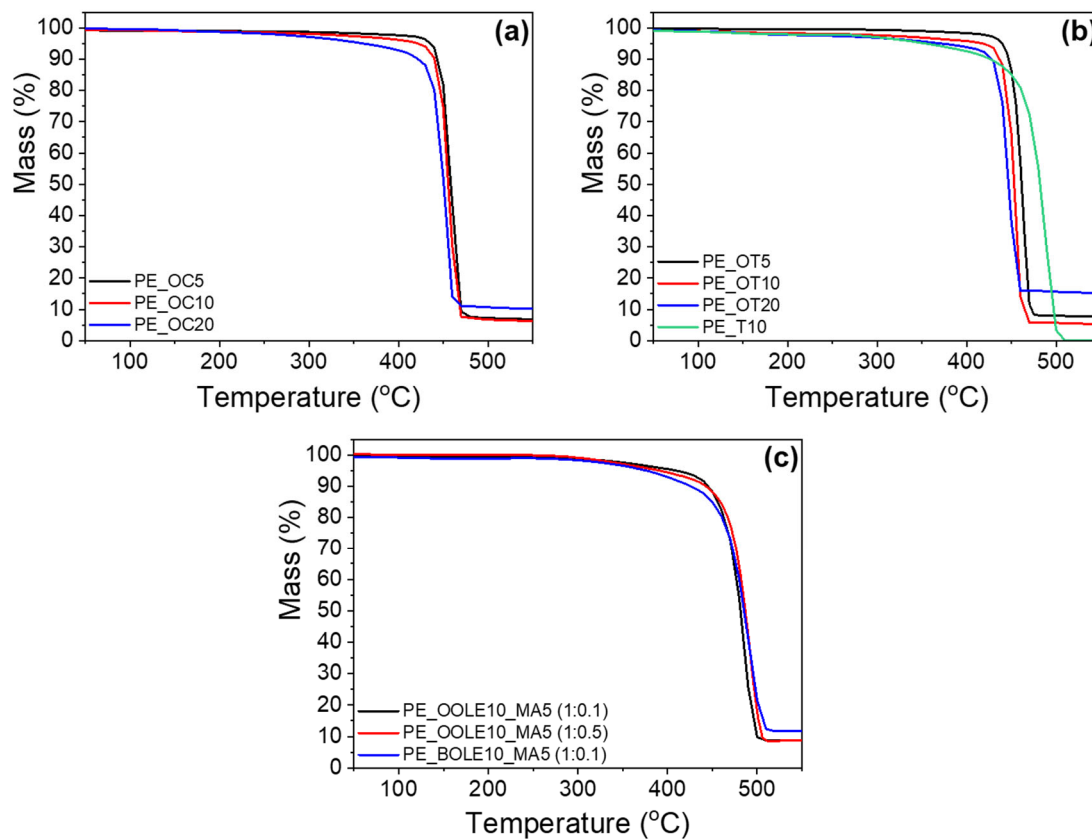

**Figure S2.** TGA profiles of films incorporated with bioactive nanocarriers with (a) carvacrol, (b) thymol and (c) OLE.

**Table S1.** Composition of selected films based on TGA analysis.

| Film's code name | Blends            | Clay:bioactive substance ratio (r) | Composition (% wt.) | Bioactive substance content (% wt.) |
|------------------|-------------------|------------------------------------|---------------------|-------------------------------------|
| PE_OC5           | LDPE/OC           | 1:1                                | 95/5                | 0.2                                 |
| PE_OC10          | LDPE/OC           | 1:1                                | 90/10               | 0.7                                 |
| PE_OC20          | LDPE/OC           | 1:1                                | 80/20               | 1.6                                 |
| PE_OT5           | LDPE/OT           | 1:1                                | 95/5                | 0.3                                 |
| PE_OT10          | LDPE/OT           | 1:1                                | 90/10               | 1.2                                 |
| PE_T10           | LDPE/T            | -                                  | 90/10               | 0.1                                 |
| PE_OT20          | LDPE/OT           | 1:1                                | 80/20               | 2.3                                 |
| PE_OOLE10_MA5    | LDPE/OOLE/PE-g-MA | 1:0.1                              | 85/10/5             | 1.1                                 |
| PE_OOLE10_MA5    | LDPE/OOLE/PE-g-MA | 1:0.5                              | 85/10/5             | 1.1                                 |
| PE_BOLE10_MA5    | LDPE/BOLE/PE-g-MA | 1:0.1                              | 85/10/5             | 0.9                                 |
